# Supplementary material for: TNFRSF1B Signaling Blockade Protects Airway Epithelial Cells from Oxidative Stress
Source: MDPI journal article supplement (doi:10.3390/antiox13030368), 2024-03-18
Supplement: s1 [file s1]

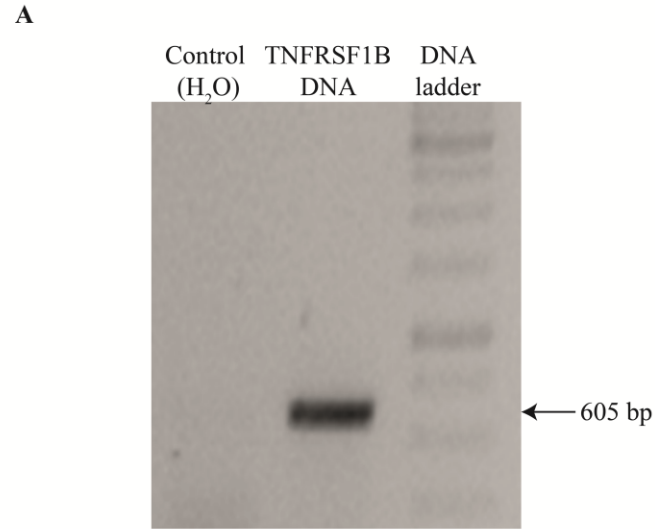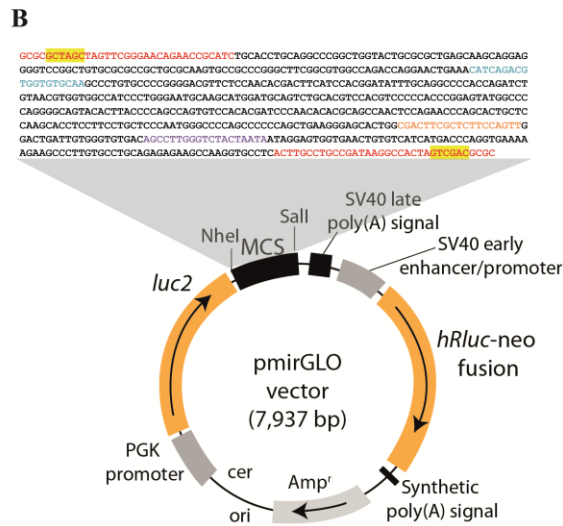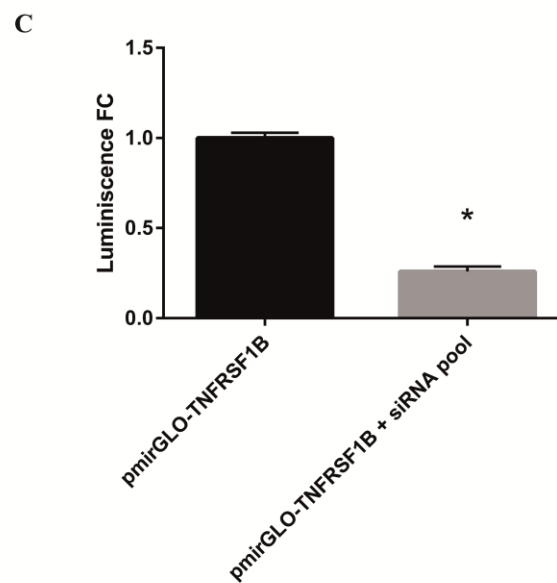

**Figure S1.** Optimized siRNAs induce efficient RNAi-mediated knock-down of TNFRSF1B. (A) PCR-mediated amplification of a 605 bp DNA portion
